# Supplementary material for: Interface molecular engineering of single-walled carbon nanotube/epoxy composites
Source: Royal Society of Chemistry journal article supplement (doi:10.1039/c1jm14310g), 2011-12-05
Supplement: c1jm14310g.pdf [file c1jm14310g.pdf]

*Electronic Supplementary Information (ESI) for*

**Interface molecular engineering of single-walled carbon  
nanotube/epoxy composites**

Yehai Yan,<sup>\*</sup> Jian Cui, Shuai Zhao, Jiwen Liu, Junmei Cheng and Jinfang Zhang

---

<sup>\*</sup> Key Laboratory of Rubber-plastics, Ministry of Education/Shandong Provincial Key Laboratory of Rubber-plastics, College of Polymer Science and Engineering, Qingdao University of Science and Technology, Qingdao 266042, China. E-mail: [yhyan@qust.edu.cn](mailto:yhyan@qust.edu.cn); Fax: +86-532-8402 3977; Tel: +86-532-8402 2416

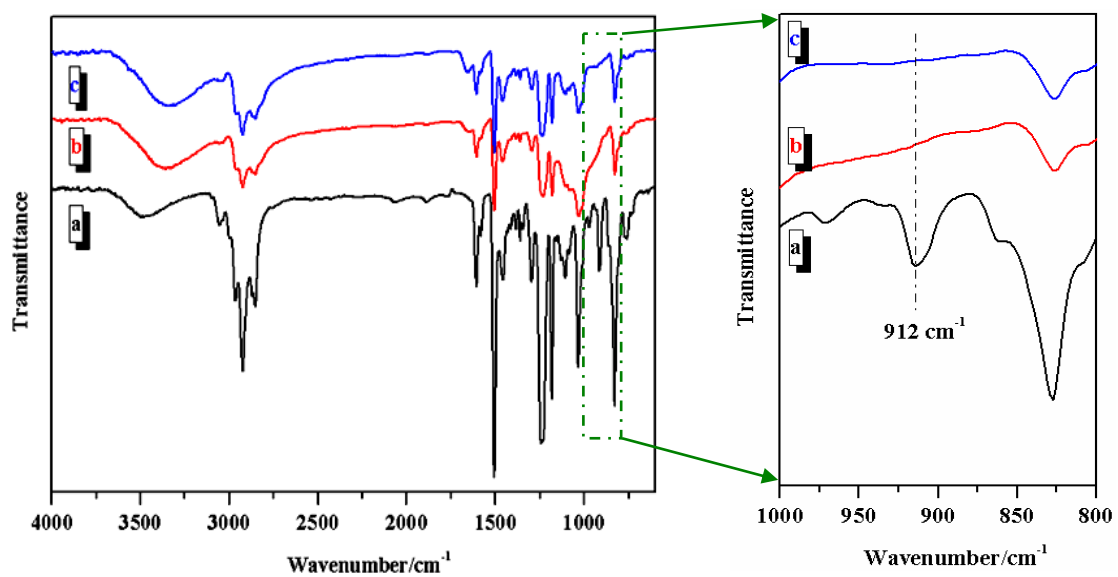

Fig. S1 FTIR spectra for a) Epofix resin, b) a cured epoxy system of Epofix resin/hardener=25:3, and c) a typical composite of SWCNT/EP-AmPy-12 containing 0.3 wt% SWCNTs. The curing cycle is 50°C/12h+100°C/2h.

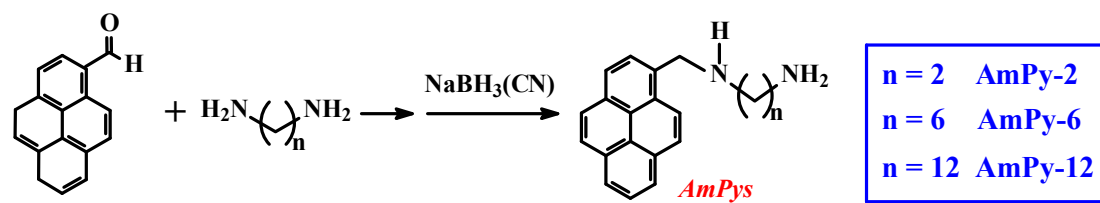

Fig. S2 Synthesis of AmPy in one step.

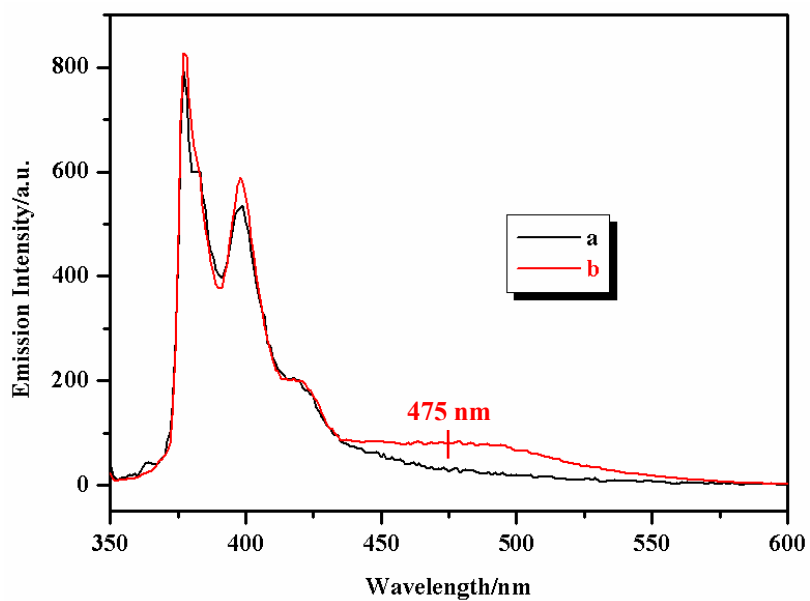

Fig. S3 Fluorescence spectra (excited at 344 nm) of a) the dispersion containing 0.08 mg.ml<sup>-1</sup> of AmPy-12 and 75.4 mg.L<sup>-1</sup> of SWCNTs and b) the dispersion containing 0.15 mg.ml<sup>-1</sup> of AmPy-12 and 62.2 mg.L<sup>-1</sup> of SWCNTs.
